# Supplementary material for: c-Myc Alters Substrate Utilization and O-GlcNAc Protein Posttranslational Modifications without Altering Cardiac Function during Early Aortic Constriction
Source: PLoS One. 2015 Aug 12;10(8):e0135262. doi: 10.1371/journal.pone.0135262 (PMC4534195; doi:10.1371/journal.pone.0135262)
Supplement: S1 Table — Flux units are μmol/g/min. Acetoacetate was used for ketones. Note: Sample 042213A was excluded for flux value calculations because of a perfusate leak from the left atrium, which would render the MVO2 value inaccurate. However, the leak does not affect the fractional contribution values. (XLSX) [file pone.0135262.s001.xlsx]

## Sheet: SI 1.
S1 Table. Individual experiment fractional contributions to the citric acid cycle for unlabeled substrates (unlabeled), acetoacetate as ketone bodies (AcAC and/or ketone), lactate, and free fatty acids (FFA) in the hearts subjected to transverse aortic constriction (TAC) and calculated estimated flux values. Flux units are µmol/g/min. Acetoacetate was used for ketones.
Note: Sample 042213A was excluded for flux value calculations because of a perfusate leak from the left atrium, which would render the MVO2 value inaccurate. However, the leak would not affect the fractional contribution values.
MycKO-TAC							MycKO-TAC
	Fractional contributions							Calculated estimated flux values (per gram heart tissue)
Sample	Unlabeled	AcAC(ketones)	Lactate	FFA			MVO2/g	CAC flux	FFA fluc	AcAc flux	lactate flux
032613D	0.29	0.18	0.23	0.29			7.23	2.66888	0.091056	0.240199	0.613843
041213B	0.15	0.24	0.19	0.41			4.83	1.8372	0.0886179	0.220464	0.349068
041213d	0.51	0.11	0.17	0.21			6.9	2.4373	0.0602157	0.134052	0.414341
041513b	0.29	0.24	0.17	0.3			5.25	1.95676	0.0690623	0.234812	0.33265
041513D	0.36	0.2	0.21	0.24			4.35	1.57552	0.0444852	0.157552	0.330858
041613C	0.41	0.15	0.22	0.22			4.85	1.7421	0.0450896	0.130657	0.383261
032613B	0.31	0.2	0.13	0.3			3.27	1.28386	0.0453128	0.128386	0.166902
ave	0.331429	0.188571	0.188571	0.281429			5.24	1.9288	0.0634056	0.178017	0.370132
sem	0.0424505	0.0177856	0.0131708	0.0257671			0.528002	0.181991	0.00765815	0.0194887	0.0502885
stdev	0.112313	0.0470562	0.0348466	0.0681734			1.39696	0.481504	0.0202616	0.0515622	0.133051
t-test	0.0092608	0.00944967	0.865043	0.0113772			0.472599	0.356637	0.0338384	0.016496	0.455402
Cont-TAC							Cont-TAC
	Fractional contributions							Calculated estimated flux values (per gram heart tissue)
Sample	Unlabeled	AcAC(ketones)	Lactate	FFA			MVO2/g	CAC flux	FFA flux	AcAcflux	lactate flux
041513C	0.2	0.26	0.2	0.35			4.62	1.72388	0.0709833	0.224104	0.344776
032613C	0.28	0.22	0.16	0.34			4.4	1.63205	0.0652819	0.179525	0.261128
041613B	0.21	0.22	0.24	0.33			6.35	2.36059	0.0916466	0.259665	0.566543
041513A	0.13	0.31	0.2	0.36			6.01	2.31332	0.0979758	0.358564	0.462664
041613A	0.19	0.25	0.17	0.38			5.79	2.20404	0.0985333	0.275504	0.374686
042213A	0.14	0.25	0.18	0.43			*					* = sample was excluded for MVO2 calculation and flux due to perfusate leak from the left atrium, which affects MVO2 calculation.
042213B	0.16	0.27	0.19	0.38			7.46	2.83112	0.126568	0.382201	0.537913
ave	0.187143	0.254286	0.191429	0.367143			5.77167	2.1775	0.0918314	0.279927	0.424618
sem	0.0192372	0.0117224	0.00986301	0.0126706			0.463677	0.181032	0.00899784	0.0317651	0.0483125
stdev	0.0508967	0.0310146	0.0260951	0.0335233			1.13577	0.443437	0.0220401	0.0778082	0.118341
